# Supplementary material
Source: MDPI journal article supplement (https://www.mdpi.com/1999-4907/14/10/2064)
Supplement: s1 [file s1]

**Supplementary Table S3. *Arabidopsis thaliana* ID number**  
**Left, the initial Arabidopsis ID; right, the named Arabidopsis ID.**

|             |                |             |                |             |                |             |                 |             |                 |
|-------------|----------------|-------------|----------------|-------------|----------------|-------------|-----------------|-------------|-----------------|
| AT3G09230.1 | <i>AtMYB1</i>  | AT5G06100.2 | <i>AtMYB35</i> | AT4G33450.1 | <i>AtMYB69</i> | AT1G63910.1 | <i>AtMYB103</i> | AT1G09770.1 | <i>AtMYB137</i> |
| AT2G47190.1 | <i>AtMYB2</i>  | AT5G57620.1 | <i>AtMYB36</i> | AT2G23290.1 | <i>AtMYB70</i> | AT2G26950.1 | <i>AtMYB104</i> | AT1G14350.1 | <i>AtMYB138</i> |
| AT1G22640.1 | <i>AtMYB3</i>  | AT5G23000.1 | <i>AtMYB37</i> | AT4G01680.3 | <i>AtMYB71</i> | AT1G69560.1 | <i>AtMYB105</i> | AT1G14350.2 | <i>AtMYB139</i> |
| AT4G38620.1 | <i>AtMYB4</i>  | AT5G06100.3 | <i>AtMYB38</i> | AT1G56160.1 | <i>AtMYB72</i> | AT3G01140.1 | <i>AtMYB106</i> | AT1G35515.1 | <i>AtMYB140</i> |
| AT3G13540.1 | <i>AtMYB5</i>  | AT4G17785.1 | <i>AtMYB39</i> | AT4G37260.1 | <i>AtMYB73</i> | AT3G02940.1 | <i>AtMYB107</i> | AT1G49010.1 | <i>AtMYB141</i> |
| AT4G09460.1 | <i>AtMYB6</i>  | AT5G14340.1 | <i>AtMYB40</i> | AT4G05100.1 | <i>AtMYB74</i> | AT3G06490.1 | <i>AtMYB108</i> | AT1G56650.1 | <i>AtMYB142</i> |
| AT2G16720.1 | <i>AtMYB7</i>  | AT4G28110.1 | <i>AtMYB41</i> | AT5G15310.1 | <i>AtMYB75</i> | AT3G55730.1 | <i>AtMYB109</i> | AT2G36890.1 | <i>AtMYB143</i> |
| AT5G16770.1 | <i>AtMYB8</i>  | AT4G12350.1 | <i>AtMYB42</i> | AT5G07700.1 | <i>AtMYB76</i> | AT2G32460.1 | <i>AtMYB110</i> | AT2G37630.1 | <i>AtMYB144</i> |
| AT5G16770.2 | <i>AtMYB9</i>  | AT5G16600.1 | <i>AtMYB43</i> | AT3G50060.1 | <i>AtMYB77</i> | AT5G49330.1 | <i>AtMYB111</i> | AT2G38090.1 | <i>AtMYB145</i> |
| AT3G12820.1 | <i>AtMYB10</i> | AT4G01680.1 | <i>AtMYB44</i> | AT5G15310.2 | <i>AtMYB78</i> | AT1G48000.1 | <i>AtMYB112</i> | AT3G11280.1 | <i>AtMYB146</i> |
| AT3G62610.1 | <i>AtMYB11</i> | AT3G48920.1 | <i>AtMYB45</i> | AT4G13480.1 | <i>AtMYB79</i> | AT1G66370.1 | <i>AtMYB113</i> | AT3G11280.2 | <i>AtMYB147</i> |
| AT2G47460.1 | <i>AtMYB12</i> | AT5G12870.1 | <i>AtMYB46</i> | AT5G67300.1 | <i>AtMYB80</i> | AT1G66380.1 | <i>AtMYB114</i> | AT3G11450.1 | <i>AtMYB148</i> |
| AT1G06180.1 | <i>AtMYB13</i> | AT1G18710.1 | <i>AtMYB47</i> | AT2G26960.1 | <i>AtMYB81</i> | AT5G40360.1 | <i>AtMYB115</i> | AT3G18100.1 | <i>AtMYB149</i> |
| AT2G31180.1 | <i>AtMYB14</i> | AT3G46130.1 | <i>AtMYB48</i> | AT5G52600.1 | <i>AtMYB82</i> | AT2G32460.2 | <i>AtMYB116</i> | AT3G18100.2 | <i>AtMYB150</i> |
| AT3G23250.1 | <i>AtMYB15</i> | AT5G54230.1 | <i>AtMYB49</i> | AT3G08500.1 | <i>AtMYB83</i> | AT1G26780.1 | <i>AtMYB117</i> | AT3G18100.3 | <i>AtMYB151</i> |
| AT5G06100.1 | <i>AtMYB16</i> | AT1G57560.1 | <i>AtMYB50</i> | AT3G49690.1 | <i>AtMYB84</i> | AT3G27785.1 | <i>AtMYB118</i> | AT3G27920.1 | <i>AtMYB152</i> |
| AT3G61250.1 | <i>AtMYB17</i> | AT1G18570.1 | <i>AtMYB51</i> | AT4G22680.1 | <i>AtMYB85</i> | AT5G58850.1 | <i>AtMYB119</i> | AT3G28470.1 | <i>AtMYB153</i> |
| AT4G25560.1 | <i>AtMYB18</i> | AT1G17950.1 | <i>AtMYB52</i> | AT5G26660.1 | <i>AtMYB86</i> | AT5G55020.1 | <i>AtMYB120</i> | AT3G52250.1 | <i>AtMYB154</i> |
| AT5G52260.1 | <i>AtMYB19</i> | AT5G65230.1 | <i>AtMYB53</i> | AT4G37780.1 | <i>AtMYB87</i> | AT3G30210.1 | <i>AtMYB121</i> | AT3G60460.1 | <i>AtMYB155</i> |
| AT1G66230.1 | <i>AtMYB20</i> | AT1G73410.1 | <i>AtMYB54</i> | AT2G26950.1 | <i>AtMYB88</i> | AT1G74080.1 | <i>AtMYB122</i> | AT4G32730.1 | <i>AtMYB156</i> |
| AT3G27810.1 | <i>AtMYB21</i> | AT4G01680.2 | <i>AtMYB55</i> | AT5G39700.1 | <i>AtMYB89</i> | AT1G25340.1 | <i>AtMYB123</i> | AT4G32730.2 | <i>AtMYB157</i> |
| AT5G40430.1 | <i>AtMYB22</i> | AT5G17800.1 | <i>AtMYB56</i> | AT1G66390.1 | <i>AtMYB90</i> | AT1G25340.2 | <i>AtMYB124</i> | AT5G01200.1 | <i>AtMYB158</i> |
| AT5G40330.1 | <i>AtMYB23</i> | AT3G01530.1 | <i>AtMYB57</i> | AT5G62470.2 | <i>AtMYB91</i> | AT1G26780.2 | <i>AtMYB125</i> | AT5G04760.1 | <i>AtMYB159</i> |
| AT5G40350.1 | <i>AtMYB24</i> | AT1G16490.1 | <i>AtMYB58</i> | AT5G10280.1 | <i>AtMYB92</i> | AT5G35550.1 | <i>AtMYB126</i> | AT5G05790.1 | <i>AtMYB160</i> |
| AT2G39880.1 | <i>AtMYB25</i> | AT5G59780.3 | <i>AtMYB59</i> | AT1G34670.1 | <i>AtMYB93</i> | AT3G29020.1 | <i>AtMYB127</i> | AT5G06110.1 | <i>AtMYB161</i> |
| AT3G13890.1 | <i>AtMYB26</i> | AT1G08810.1 | <i>AtMYB60</i> | AT3G47600.1 | <i>AtMYB94</i> | AT3G29020.2 | <i>AtMYB128</i> | AT5G06110.2 | <i>AtMYB162</i> |
| AT3G53200.1 | <i>AtMYB27</i> | AT1G09540.1 | <i>AtMYB61</i> | AT1G74430.1 | <i>AtMYB95</i> | AT4G00540.1 | <i>AtMYB129</i> | AT5G08520.1 | <i>AtMYB163</i> |
| AT5G61420.2 | <i>AtMYB28</i> | AT1G68320.1 | <i>AtMYB62</i> | AT5G62470.1 | <i>AtMYB96</i> | AT4G00540.2 | <i>AtMYB130</i> | AT5G23650.1 | <i>AtMYB164</i> |
| AT5G07690.1 | <i>AtMYB29</i> | AT1G79180.1 | <i>AtMYB63</i> | AT4G26930.1 | <i>AtMYB97</i> | AT3G09370.1 | <i>AtMYB131</i> | AT2G02820.1 | <i>AtMYB165</i> |
| AT3G28910.1 | <i>AtMYB30</i> | AT5G11050.1 | <i>AtMYB64</i> | AT4G18770.1 | <i>AtMYB98</i> | AT3G09370.2 | <i>AtMYB132</i> | AT2G02820.2 | <i>AtMYB166</i> |
| AT1G74650.1 | <i>AtMYB31</i> | AT3G11440.1 | <i>AtMYB65</i> | AT5G62320.1 | <i>AtMYB99</i> | AT5G11510.1 | <i>AtMYB133</i> | AT5G49620.1 | <i>AtMYB167</i> |
| AT4G34990.1 | <i>AtMYB32</i> | AT5G14750.1 | <i>AtMYB66</i> | AT2G25230.1 | <i>AtMYB10</i> | AT5G11510.2 | <i>AtMYB134</i> | AT3G24310.1 | <i>AtMYB168</i> |
| AT3G13890.2 | <i>AtMYB33</i> | AT3G12720.1 | <i>AtMYB67</i> | AT5G56110.1 | <i>AtMYB10</i> | AT5G02320.1 | <i>AtMYB135</i> |             |                 |
| AT5G60890.1 | <i>AtMYB34</i> | AT5G65790.1 | <i>AtMYB68</i> | AT4G21440.1 | <i>AtMYB10</i> | AT5G02320.2 | <i>AtMYB136</i> |             |                 |
